# Supplementary material for: Gibberellin Induced Transcriptome Profiles Reveal Gene Regulation of Loquat Flowering
Source: Front Genet. 2021 Sep 10;12:703688. doi: 10.3389/fgene.2021.703688 (PMC8460860; doi:10.3389/fgene.2021.703688)
Supplement: Supplementary file 8 [file Table_8.XLSX]

## Sheet: Sheet1
Table S8 The FPKM value of the candidate genes in the coexpression network
Gene id	Bud						Gene name	Chromosome	Start	End	Strand	Length	Biotype	Description	Family
	GA3 treatment			CK
	May	June	August	May	June	August
Eri000963	42.3394	35.6657	33.6359	40.0353	34.0101	106.756	ERIdvaD_GLEAN_10006873	scaffold1011	151984	154781	-	1065	-	-	-
Eri001384	156.967	100.922	90.2047	119.176	114.516	171.6	ERIdvaD_GLEAN_10014803	scaffold1027	763490	775006	+	1752	-	-	-
Eri001487	29.6121	51.9948	31.0421	28.6484	29.4142	86.2283	ERIdvaD_GLEAN_10023833	scaffold1031	1162507	1164070	-	957	-	-	-
Eri002218	7.96066	11.4254	12.898	15.2127	13.1803	31.3942	ERIdvaD_GLEAN_10017034	scaffold1089	158529	161611	+	1680	-	-	-
Eri002330	10.827	7.93346	7.49755	6.95344	6.80338	14.0445	ERIdvaD_GLEAN_10010852	scaffold1090	515165	516292	+	1128	-	-	-
Eri002341	136.178	84.9108	129.404	114.286	123.514	267.032	ERIdvaD_GLEAN_10001786	scaffold1096	9469	12364	+	1173	-	-	-
Eri002390	4.98093	4.79342	3.66134	4.79374	4.1322	6.27845	ERIdvaD_GLEAN_10030785	scaffold11	646474	649454	+	1779	-	-	-
Eri002697	15.1368	11.8592	10.0664	9.81621	9.62896	14.0035	ERIdvaD_GLEAN_10009133	scaffold111	239140	242357	-	2145	-	-	-
Eri003561	27.934	15.7413	22.0057	21.4025	20.5917	34.9783	ERIdvaD_GLEAN_10034343	scaffold115	3410240	3412086	-	684	-	-	-
Eri003562	12.7994	9.63883	9.91282	9.80148	9.33555	19.355	CUFF42.353.1	scaffold115	3412296	3412998	-	513	-	-	-
Eri003572	12.2724	7.98984	10.0405	9.80855	8.58239	18.527	ERIdvaD_GLEAN_10034350	scaffold115	3843449	3844621	+	1173	-	-	-
Eri003621	84.3243	68.4343	74.767	93.2527	101.42	202.115	ERIdvaD_GLEAN_10017229	scaffold1150	404009	406861	-	1176	-	-	-
Eri003622	430.763	354.59	392.845	457.153	467.718	1008.56	ERIdvaD_GLEAN_10017230	scaffold1150	429150	430846	-	1110	-	-	-
Eri003637	7.91464	9.53405	7.25413	11.4509	12.0724	21.214	ERIdvaD_GLEAN_10017245	scaffold1150	655157	657898	-	1059	-	-	-
Eri003694	6.29453	5.28459	5.37357	5.93252	5.47504	8.52094	ERIdvaD_GLEAN_10009044	scaffold1152	398071	402748	+	2418	-	-	-
Eri003777	5.28786	4.88312	4.61549	5.0173	5.1206	7.36192	ERIdvaD_GLEAN_10008612	scaffold1160	254648	257977	+	2823	-	-	-
Eri004145	15.8378	13.523	12.8129	14.1585	11.5456	17.7115	ERIdvaD_GLEAN_10023070	scaffold118	1040744	1042693	+	1380	-	-	-
Eri004425	71.2214	46.4603	41.7464	47.9277	43.3861	97.5688	ERIdvaD_GLEAN_10012509	scaffold12	347099	348442	-	1344	-	-	-
Eri004601	4.07681	4.34431	4.30693	4.8465	3.64244	8.57235	ERIdvaD_GLEAN_10025183	scaffold1209	1299660	1302865	+	2133	-	-	-
Eri005671	20.5642	15.3053	13.5795	18.9174	16.5598	23.0738	ERIdvaD_GLEAN_10024622	scaffold127	778983	781310	-	822	-	-	-
Eri006021	15.4638	7.02258	13.6542	12.2482	8.145	24.2528	ERIdvaD_GLEAN_10006478	scaffold1294	218016	221241	-	1200	-	-	-
Eri007397	1.81471	1.6007	2.16245	1.23949	1.63954	8.7985	ERIdvaD_GLEAN_10002546	scaffold1393	22682	26155	-	1236	-	-	-
Eri007434	70.9709	59.6947	84.9534	47.3412	37.1126	110.842	ERIdvaD_GLEAN_10008724	scaffold1397	243360	245083	+	1161	-	-	-
Eri007443	9.44258	5.20035	6.68711	6.49644	5.26689	10.2545	ERIdvaD_GLEAN_10008732	scaffold1397	370219	371786	+	1065	-	-	-
Eri007931	26.6931	40.1152	40.551	32.0411	25.5539	39.8485	ERIdvaD_GLEAN_10003153	scaffold1433	4140	6728	+	1440	-	-	-
Eri008028	69.3388	58.5646	80.8997	67.5213	76.8461	146.395	ERIdvaD_GLEAN_10015941	scaffold1449	262198	265623	+	1314	-	-	-
Eri008246	12.9125	11.9666	9.70532	10.7026	8.79089	13.4506	ERIdvaD_GLEAN_10006511	scaffold1469	104180	113542	+	1368	-	-	-
Eri008280	58.3934	44.3214	50.0047	42.6274	44.1681	63.3796	ERIdvaD_GLEAN_10016688	scaffold147	162766	167253	-	1062	-	-	-
Eri008297	1.25446	1.38691	1.57704	2.69909	1.87403	6.56757	CUFF96.29.1	scaffold147	451418	454290	-	1758	-	-	-
Eri008647	17.4511	18.048	18.0288	23.2833	19.5955	48.2614	ERIdvaD_GLEAN_10027221	scaffold150	1506482	1510155	+	1107	-	-	-
Eri009159	5.30418	4.70793	6.87744	5.37239	5.84762	14.0144	ERIdvaD_GLEAN_10031301	scaffold159	215291	217511	+	1041	-	-	-
Eri009162	63.173	54.149	67.7944	73.9898	57.7922	96.992	ERIdvaD_GLEAN_10031304	scaffold159	229878	230903	+	1026	-	-	-
Eri009422	15.4549	16.2853	18.9829	24.5745	22.874	44.1057	ERIdvaD_GLEAN_10031549	scaffold159	2592599	2594544	+	1374	-	-	-
Eri009460	15.8897	11.9581	11.6119	12.3446	11.4204	22.8796	ERIdvaD_GLEAN_10005974	scaffold1595	159004	161933	+	1119	-	-	-
Eri009668	10.8891	7.0998	8.01986	6.81422	7.12492	16.6676	ERIdvaD_GLEAN_10004905	scaffold1601	206871	210997	-	2400	-	-	-
Eri010517	11.9777	11.7122	10.2552	11.5792	11.6572	17.114	ERIdvaD_GLEAN_10018271	scaffold17	161456	169968	-	2106	-	-	-
Eri010611	144.959	72.8776	88.8951	80.7712	73.5488	148.125	ERIdvaD_GLEAN_10032350	scaffold170	419420	420146	+	231	-	-	-
Eri011206	6.59	4.04121	3.74799	4.06128	3.517	7.3522	ERIdvaD_GLEAN_10005644	scaffold1749	208008	210926	-	1551	-	-	-
Eri011238	6.0962	5.31875	5.68292	3.88516	3.72329	11.1953	ERIdvaD_GLEAN_10009449	scaffold1750	240921	242543	-	1080	-	-	-
Eri011929	34.564	35.0652	33.1524	37.4645	37.9472	52.356	ERIdvaD_GLEAN_10001290	scaffold1824	33824	37059	+	1707	-	-	-
Eri012421	13.9045	14.5214	16.0937	13.1032	14.3131	43.999	ERIdvaD_GLEAN_10005997	scaffold1939	245371	247763	-	1377	-	-	-
Eri012512	7.43135	3.95892	4.54214	6.61349	5.88041	19.7133	CUFF146.9.1	scaffold1950	119115	120481	+	603	-	-	-
Eri012938	68.534	50.61	71.3972	48.1131	43.7671	81.8605	ERIdvaD_GLEAN_10000830	scaffold2028	49014	50989	-	1233	-	-	-
Eri013145	34.6495	23.985	30.5362	22.9182	19.0629	49.4062	ERIdvaD_GLEAN_10011889	scaffold208	189391	192695	+	1743	-	-	-
Eri013174	10.7972	5.75755	6.10641	8.21273	6.12071	16.2504	ERIdvaD_GLEAN_10011921	scaffold208	401632	404307	-	2145	-	-	-
Eri013444	4.60601	3.58812	5.11361	4.23163	3.22482	8.05497	ERIdvaD_GLEAN_10027736	scaffold212	1775801	1778634	+	1689	-	-	-
Eri014212	18.3222	16.6514	17.5483	24.3985	21.9172	45.7301	ERIdvaD_GLEAN_10033365	scaffold22	3664099	3665591	+	1149	-	-	-
Eri014352	2.00276	1.38345	1.82694	1.66038	1.48384	2.89677	CUFF163.170.1	scaffold222	1236343	1239990	+	1479	-	-	-
Eri014667	4.44911	3.21563	6.26806	3.34279	3.56507	11.3722	ERIdvaD_GLEAN_10016931	scaffold228	883266	884837	-	1227	-	-	-
Eri014753	39.9028	26.1949	26.544	23.918	19.0298	74.6084	ERIdvaD_GLEAN_10011449	scaffold2294	491404	493451	+	1314	-	-	-
Eri014878	10.9259	24.1321	29.3394	24.0647	23.607	35.4794	ERIdvaD_GLEAN_10015861	scaffold231	418241	420061	+	1089	-	-	-
Eri014936	12.2686	10.3413	11.0239	10.5722	9.23717	13.6272	ERIdvaD_GLEAN_10026963	scaffold232	955297	960677	+	2112	-	-	-
Eri015119	61.9114	46.1557	42.8483	51.0686	40.4785	77.1665	ERIdvaD_GLEAN_10027483	scaffold234	995532	998830	+	1581	-	-	-
Eri015226	6.98348	5.87821	4.48328	4.84657	4.69902	6.94613	ERIdvaD_GLEAN_10003008	scaffold2344	187250	196282	+	3711	-	-	-
Eri015327	12.5589	8.90228	12.4564	11.2141	8.79375	14.1491	ERIdvaD_GLEAN_10008461	scaffold237	306794	309640	-	1740	-	-	-
Eri015896	7.05443	5.25723	6.66439	6.10789	5.85735	7.80535	ERIdvaD_GLEAN_10001793	scaffold2474	33659	35617	-	1959	-	-	-
Eri015963	114.421	93.0405	114.427	82.3148	96.6242	233.001	ERIdvaD_GLEAN_10033392	scaffold25	280137	281300	+	825	-	-	-
Eri016496	22.0506	14.0121	12.2076	18.1501	13.7203	38.3415	ERIdvaD_GLEAN_10014685	scaffold257	46169	50805	-	1815	-	-	-
Eri016628	14.7779	10.9712	10.1964	13.4384	10.8619	15.9356	ERIdvaD_GLEAN_10013150	scaffold26	274708	277176	-	1632	-	-	-
Eri016789	52.3436	57.4473	66.3282	48.2165	43.1313	141.243	ERIdvaD_GLEAN_10003367	scaffold262	130048	130881	+	528	-	-	-
Eri016790	54.1364	41.398	45.542	59.7889	48.0168	137.193	ERIdvaD_GLEAN_10003368	scaffold262	157646	158652	+	417	-	-	-
Eri016793	47.945	38.3191	39.8292	37.2833	36.0262	47.7801	ERIdvaD_GLEAN_10003369	scaffold262	207983	210036	-	519	-	-	-
Eri017634	6.60888	8.2564	9.85049	11.6953	10.9794	23.8389	ERIdvaD_GLEAN_10019198	scaffold277	628543	632746	+	3129	-	-	-
Eri018826	20.3621	14.6842	16.4788	11.9796	10.3163	27.4885	ERIdvaD_GLEAN_10021868	scaffold304	485924	488697	-	1785	-	-	-
Eri018981	15.5774	10.3322	14.3861	13.3013	10.9602	22.1241	ERIdvaD_GLEAN_10004231	scaffold309	217413	219197	+	1281	-	-	-
Eri019069	40.5451	27.8521	33.0593	28.8965	27.9376	42.7924	ERIdvaD_GLEAN_10009754	scaffold312	202899	208723	-	1173	-	-	-
Eri019070	12.3405	9.08808	9.3347	9.63473	10.0806	18.3608	ERIdvaD_GLEAN_10009756	scaffold312	210360	218191	-	1053	-	-	-
Eri020110	30.019	15.3135	27.3228	19.5431	17.3325	59.5933	ERIdvaD_GLEAN_10016305	scaffold345	412679	415040	+	972	-	-	-
Eri020458	69.4708	96.3482	128.835	137.346	137.554	193.785	ERIdvaD_GLEAN_10025974	scaffold359	735371	737905	+	1074	-	-	-
Eri020474	10.6294	7.83938	6.90874	8.4051	6.68509	18.1672	ERIdvaD_GLEAN_10025989	scaffold359	897364	899638	+	1650	-	-	-
Eri020970	5.29619	4.56174	5.84208	4.37486	3.67026	8.39507	ERIdvaD_GLEAN_10028706	scaffold375	330388	334956	+	2223	-	-	-
Eri021395	23.4434	23.9663	21.2559	22.1594	18.4772	34.4613	ERIdvaD_GLEAN_10021955	scaffold382	857548	859148	-	939	-	-	-
Eri021786	11.964	11.9627	11.6468	12.4536	10.1024	14.7315	ERIdvaD_GLEAN_10030116	scaffold396	1827968	1830716	-	1284	-	-	-
Eri021848	47.3532	30.9563	40.13	45.3933	39.2873	69.0149	ERIdvaD_GLEAN_10013721	scaffold397	350582	355186	-	1029	-	-	-
Eri022116	27.6936	19.153	15.2312	20.2143	18.6566	24.9648	CUFF246.55.2	scaffold401	503485	507731	-	528	-	-	-
Eri022269	1.28256	1.05745	2.40123	1.40098	1.38812	11.9165	CUFF249.101.1	scaffold41	735735	738550	+	1227	-	-	-
Eri022393	73.1447	61.7161	58.2497	68.914	56.0437	79.9656	ERIdvaD_GLEAN_10013800	scaffold415	458342	458977	+	636	-	-	-
Eri022474	50.8751	35.8219	29.1068	42.7063	41.587	76.0986	ERIdvaD_GLEAN_10000271	scaffold4214	3946	6022	-	858	-	-	-
Eri022800	4.32737	2.79923	1.95503	2.7497	2.49596	3.75672	CUFF255.140.1	scaffold435	828931	837539	-	1755	-	-	-
Eri023032	7.8519	6.23012	5.81501	7.24035	5.558	13.6764	ERIdvaD_GLEAN_10021788	scaffold445	813097	820581	-	2238	-	-	-
Eri023844	182.326	188.999	159.014	195.71	161.412	335.902	ERIdvaD_GLEAN_10019489	scaffold468	825086	830187	-	717	-	-	-
Eri023891	7.56007	7.78924	8.75959	12.4915	11.8613	24.3166	ERIdvaD_GLEAN_10032088	scaffold472	125507	136969	+	2991	-	-	-
Eri024134	12.5584	6.18562	9.81316	10.108	9.84696	14.5642	ERIdvaD_GLEAN_10032299	scaffold472	2400473	2402524	-	2052	-	-	-
Eri024291	26.9754	15.1259	16.3586	14.911	12.9131	37.485	ERIdvaD_GLEAN_10015443	scaffold475	786211	787650	-	1041	-	-	-
Eri024326	67.5308	52.7807	60.7203	63.4204	64.8555	130.121	ERIdvaD_GLEAN_10029908	scaffold478	162708	164958	-	582	-	-	-
Eri024339	10.3717	8.99986	8.04636	9.06991	8.7001	11.6231	ERIdvaD_GLEAN_10029920	scaffold478	404685	406495	+	1395	-	-	-
Eri024619	48.0424	31.4293	32.7892	48.6249	37.5065	60.3751	ERIdvaD_GLEAN_10002016	scaffold483	81473	84599	-	2238	-	-	-
Eri024741	765.366	568.157	818.536	851.235	827.335	1093.12	ERIdvaD_GLEAN_10016784	scaffold487	737777	738672	-	462	-	-	-
Eri024851	14.7483	20.779	28.8827	26.0349	25.317	38.2442	ERIdvaD_GLEAN_10027957	scaffold489	1097913	1102736	+	1317	-	-	-
Eri025024	78.7886	67.9592	103.523	91.3354	96.1257	201.158	ERIdvaD_GLEAN_10003763	scaffold494	97881	98282	+	402	-	-	-
Eri025247	16.76	12.9708	11.8865	11.9376	11.017	23.8607	ERIdvaD_GLEAN_10024465	scaffold499	1264132	1266769	+	1704	-	-	-
Eri025359	64.9427	50.8191	48.1643	60.5387	55.6407	69.3836	ERIdvaD_GLEAN_10032856	scaffold5	1081687	1090024	-	717	-	-	-
Eri025370	58.1681	42.2223	40.6989	40.7203	34.9356	62.8519	ERIdvaD_GLEAN_10032867	scaffold5	1202996	1204160	+	969	-	-	-
Eri025843	5.04222	5.12803	5.14157	5.63548	4.75199	14.3012	ERIdvaD_GLEAN_10021134	scaffold505	1120613	1123839	+	1518	-	-	-
Eri026949	9.34258	7.16418	5.94312	7.05278	6.95292	14.5995	ERIdvaD_GLEAN_10030355	scaffold54	648975	653578	+	2304	-	-	-
Eri027065	29.4474	21.0343	17.9623	22.0185	19.5343	27.5431	ERIdvaD_GLEAN_10030451	scaffold54	2510995	2517175	+	2898	-	-	-
Eri027212	8.56798	6.59392	6.54815	6.8501	6.6543	8.86588	ERIdvaD_GLEAN_10019442	scaffold549	1054521	1074028	-	1134	-	-	-
Eri027478	3.42666	4.36577	3.78164	4.08104	3.70865	5.50102	ERIdvaD_GLEAN_10003716	scaffold557	72818	76969	-	2487	-	-	-
Eri027687	34.3949	32.4458	28.4561	38.0433	37.4144	51.132	ERIdvaD_GLEAN_10026677	scaffold562	1327857	1334182	-	2742	-	-	-
Eri028216	55.2029	69.6691	71.8519	72.7154	76.1568	49.0133	ERIdvaD_GLEAN_10013250	scaffold58	90858	94064	+	1761	-	-	-
Eri028739	7.58478	5.87584	6.94031	6.39539	5.94233	16.0159	ERIdvaD_GLEAN_10016677	scaffold600	609138	609954	-	666	-	-	-
Eri028936	4.19345	4.00904	3.3811	3.50181	3.73182	7.65842	ERIdvaD_GLEAN_10021005	scaffold605	519925	521137	-	924	-	-	-
Eri028987	29.39	17.2326	23.0305	21.6433	22.2886	70.0717	ERIdvaD_GLEAN_10001912	scaffold606	65688	70474	+	1404	-	-	-
Eri029492	104.518	86.4413	107.53	94.6538	85.3085	239.896	ERIdvaD_GLEAN_10018026	scaffold619	388054	389784	-	492	-	-	-
Eri029647	27.2837	22.4291	23.3104	28.3272	21.6165	35.3525	ERIdvaD_GLEAN_10028458	scaffold624	1083703	1086007	+	1611	-	-	-
Eri029697	32.3626	25.0431	39.943	27.1575	23.3946	33.551	CUFF330.283.1	scaffold624	1894895	1896928	-	834	-	-	-
Eri029851	8.58586	7.5873	10.8107	7.55588	6.77168	23.3489	ERIdvaD_GLEAN_10026356	scaffold635	201082	203460	+	990	-	-	-
Eri029888	39.6174	29.2564	33.034	41.9471	40.493	60.9485	ERIdvaD_GLEAN_10026384	scaffold635	669742	674654	-	1854	-	-	-
Eri030460	8.27256	4.4205	7.83755	7.47329	5.65002	20.9586	ERIdvaD_GLEAN_10034100	scaffold64	2972991	2974538	+	360	-	-	-
Eri030695	35.5992	28.7921	29.3816	28.3144	28.9217	45.4414	CUFF335.146.1	scaffold641	1310713	1314612	+	1101	-	-	-
Eri030893	2.47938	1.34946	1.40481	0.950833	0.878721	2.26359	ERIdvaD_GLEAN_10030985	scaffold648	8250	10847	+	1542	-	-	-
Eri030934	6.49322	4.76606	4.22854	5.18389	4.97959	8.88477	CUFF337.128.1	scaffold648	375238	377222	+	966	-	-	-
Eri031118	14.1888	12.3903	10.7506	9.29668	9.56655	19.1214	ERIdvaD_GLEAN_10031192	scaffold648	2191564	2195998	-	2133	-	-	-
Eri031792	6.58664	5.59669	6.18672	7.29185	6.13998	9.64894	ERIdvaD_GLEAN_10012757	scaffold675	441255	441737	+	483	-	-	-
Eri031997	255.7	644.752	317.406	186.543	158.659	560.342	ERIdvaD_GLEAN_10009393	scaffold684	446938	449386	+	1764	-	-	-
Eri031999	94.2246	233.31	142.147	131.626	123.997	197.391	ERIdvaD_GLEAN_10009395	scaffold684	491117	494908	+	1764	-	-	-
Eri032049	39.5157	35.4163	40.1414	42.0579	47.684	68.816	ERIdvaD_GLEAN_10014218	scaffold688	272384	273376	+	993	-	-	-
Eri032699	4.64236	5.14096	5.06029	4.4729	4.42139	8.42524	ERIdvaD_GLEAN_10005565	scaffold70	243197	249233	+	2832	-	-	-
Eri033099	6.36959	7.69654	7.57912	10.6854	8.89446	19.5148	ERIdvaD_GLEAN_10020374	scaffold713	432313	443885	-	5100	-	-	-
Eri033232	60.6161	41.1714	40.1304	52.797	41.9732	101.995	ERIdvaD_GLEAN_10008781	scaffold721	371112	377689	+	2373	-	-	-
Eri033781	209.984	116.087	168.544	156.009	138.761	196.181	ERIdvaD_GLEAN_10028315	scaffold741	1768202	1768782	-	360	-	-	-
Eri033953	187.957	108.531	148.345	171.56	140.932	475.016	ERIdvaD_GLEAN_10011607	scaffold746	70114	71429	+	531	-	-	-
Eri033973	9.54152	6.25471	6.07219	7.25877	7.96611	13.7646	ERIdvaD_GLEAN_10011621	scaffold746	461171	466027	+	1965	-	-	-
Eri034198	70.1843	59.3784	66.4133	68.397	60.7449	84.1146	ERIdvaD_GLEAN_10007761	scaffold757	174742	177800	-	1716	-	-	-
Eri034301	9.36131	11.0707	13.2866	17.0819	13.9244	30.5622	ERIdvaD_GLEAN_10018446	scaffold763	366608	369283	-	996	-	-	-
Eri034524	20.1432	18.9734	22.6094	25.5355	20.5617	31.1908	ERIdvaD_GLEAN_10033601	scaffold77	990119	994448	-	2163	-	-	-
Eri035658	8.32959	5.13668	5.61826	6.67233	5.51344	11.3915	ERIdvaD_GLEAN_10014962	scaffold805	770068	772292	-	1308	-	-	-
Eri035782	119.32	87.4318	103.053	82.6952	85.924	222.092	ERIdvaD_GLEAN_10023594	scaffold809	879405	880343	+	714	-	-	-
Eri036193	3.13733	2.68579	2.05736	1.98209	2.06105	3.92712	ERIdvaD_GLEAN_10014415	scaffold822	607409	615356	+	4053	-	-	-
Eri036249	6.0788	7.12391	5.34154	7.04567	7.33942	12.2706	ERIdvaD_GLEAN_10009918	scaffold829	242743	244474	+	930	-	-	-
Eri036348	14.9564	11.5026	12.0209	11.742	10.5447	19.351	ERIdvaD_GLEAN_10030248	scaffold83	840065	843437	+	2364	-	-	-
Eri036677	48.2074	36.2559	39.7782	38.298	33.3182	46.3058	ERIdvaD_GLEAN_10029705	scaffold834	2119374	2122236	-	1998	-	-	-
Eri036836	91.5879	89.4699	106.906	95.3661	92.2584	137.542	ERIdvaD_GLEAN_10008476	scaffold840	112493	113557	+	1065	-	-	-
Eri036884	24.7298	12.9459	15.9107	23.0235	23.6101	43.1127	ERIdvaD_GLEAN_10008822	scaffold841	398257	400315	-	1212	-	-	-
Eri036904	11.5283	6.9574	6.96946	10.5452	10.539	15.2671	ERIdvaD_GLEAN_10007432	scaffold842	273871	277690	+	1710	-	-	-
Eri036935	11.3284	16.7973	20.9665	20.7362	17.7553	28.2356	ERIdvaD_GLEAN_10010213	scaffold843	358845	359903	-	1059	-	-	-
Eri037404	10.1743	10.0536	10.1306	11.658	7.48121	32.7966	ERIdvaD_GLEAN_10001976	scaffold852	83276	85760	-	2079	-	-	-
Eri037428	48.6726	36.3701	41.3694	50.7537	48.1042	106.721	ERIdvaD_GLEAN_10019030	scaffold854	51498	56291	-	1263	-	-	-
Eri037740	79.6715	80.6673	81.7544	114.713	92.035	170.682	ERIdvaD_GLEAN_10022182	scaffold857	1071380	1073747	+	1029	-	-	-
Eri037868	14.3807	10.4513	13.122	14.3101	11.384	19.1639	ERIdvaD_GLEAN_10019736	scaffold869	64120	64794	+	675	-	-	-
Eri039334	8.79874	5.05118	5.66732	6.4203	4.92516	8.38826	ERIdvaD_GLEAN_10002758	scaffold938	67989	70326	+	768	-	-	-
Eri039416	37.9549	48.2005	34.4884	37.458	43.5689	51.0843	ERIdvaD_GLEAN_10022547	scaffold94	657982	659650	+	1197	-	-	-
Eri039435	7.0366	5.13743	4.77146	5.78548	5.22448	7.50338	ERIdvaD_GLEAN_10022562	scaffold94	863671	866260	+	1539	-	-	-
Eri039776	2.55307	2.79163	3.69461	3.79669	3.49982	8.1328	ERIdvaD_GLEAN_10003983	scaffold958	203711	207520	-	1155	-	-	-
Eri039862	3.73317	2.00888	3.01103	3.27702	2.826	6.88933	ERIdvaD_GLEAN_10001364	scaffold961	62790	68980	-	1401	-	-	-
Eri039872	5.58012	7.65246	9.0087	10.1053	9.63021	22.6254	ERIdvaD_GLEAN_10001205	scaffold962	58465	69684	+	4035	-	-	-
Eri040188	10.0433	7.3317	9.03402	7.24481	7.49983	19.6535	ERIdvaD_GLEAN_10005607	scaffold981	92143	95581	-	1992	-	-	-
novel.1977	9.53856	11.2853	11.2981	9.87309	11.7136	16.7763	-	scaffold13284	48	1680	-	846	-	-	-
novel.3437	26.4308	21.9281	24.9099	23.5335	21.858	33.1027	-	scaffold22	106883	109298	+	1473	-	PF14215:bHLH-MYC and R2R3-MYB transcription factors N-terminal	-
novel.3633	3.45648	2.48444	2.96353	2.7176	2.74579	3.75738	-	scaffold235	327821	330903	+	1754	-	-	-
novel.3840	4.14477	3.58957	4.46648	3.63224	3.41976	4.89819	-	scaffold253	1018939	1023073	+	4135	-	-	-
novel.5424	5.59791	4.26168	4.76049	6.1018	4.91355	7.82723	-	scaffold472	200824	205675	-	3030	-	PF10250:GDP-fucose protein O-fucosyltransferase|PF00860:Permease family	-
novel.671	7.89686	4.91119	6.02124	6.06665	4.90444	17.5188	-	C18991549	515	1294	-	692	-	-	-
novel.6711	3.15028	3.41444	2.08613	5.94164	3.53827	3.5811	-	scaffold66	80294	82856	-	1187	-	-	-
novel.6712	5.70968	5.81757	5.7183	7.2766	5.23201	6.37691	-	scaffold66	141660	143327	-	1111	-	-	-
novel.6713	4.03244	4.30546	4.85371	4.27358	4.38323	4.81856	-	scaffold66	343895	406130	-	9655	-	-	-
novel.6715	0	0	0	0	0	0	-	scaffold66	529034	529630	-	288	-	-	-
novel.6717	0.241323	0.322092	0.321639	0.182197	0.762135	0.54626	-	scaffold66	1000568	1002042	-	1093	-	-	-
novel.6718	0.0160291	0	0	0	0.0127082	0	-	scaffold66	1252853	1260483	-	1355	-	-	-
novel.6719	0.868075	1.24566	1.01335	0.783436	1.15126	1.0406	-	scaffold66	1254884	1255509	-	626	-	-	-
novel.7510	1.86541	1.72601	1.91709	1.95148	1.87449	2.58539	-	scaffold816	382901	385126	-	1684	-	-	-
novel.770	9.0255	6.4707	7.31896	7.52046	6.80933	21.9453	-	C19057979	1	2069	+	1172	-	-	-
novel.7700	0.179854	0.273248	0.320507	0.0554608	0.0875505	0.319119	-	scaffold844	640182	640961	+	666	-	-	-
novel.7701	0.651445	0.610057	0.635297	0.549861	0.820654	0.610487	-	scaffold844	171384	175176	-	1481	-	-	-
novel.7702	2.68185	5.21326	3.81983	2.80217	3.11895	3.48766	-	scaffold844	256944	260011	-	657	-	-	-
novel.7703	11.3845	10.6257	11.096	12.3379	11.1445	9.3359	-	scaffold844	460099	461344	-	1051	-	-	-
novel.7704	1.81688	3.28592	2.7364	1.22737	2.06151	1.63607	-	scaffold844	589002	590769	-	1689	-	-	-
novel.7705	1.10418	1.59061	1.24659	0.957556	1.32865	1.19924	-	scaffold844	636045	641079	-	2017	-	-	-
novel.7706	4.50902	4.52132	3.1706	4.65043	4.41541	5.26357	-	scaffold8454	268	1816	+	458	-	-	-
novel.7707	2.84608	3.1107	3.01022	3.28344	2.17781	2.96804	-	scaffold8476	1	851	+	593	-	-	-
novel.7708	1.35266	1.55438	1.98311	1.60577	1.70674	1.41715	-	scaffold8482	2339	4803	+	486	-	-	-
novel.7709	0.521077	1.40121	0.497008	0.796744	0.61608	1.00346	-	scaffold8496	1	411	-	318	-	-	-
novel.7945	31.0625	19.0379	22.7799	30.9151	26.201	53.9393	-	scaffold885	636416	638444	-	2029	-	-	-
novel.8314	2.84475	3.64254	2.50246	2.69127	2.78487	7.49668	-	scaffold973	610381	613999	-	3047	-	-	-
novel.989	1.10745	1.08243	1.03333	1.0245	1.0208	2.42725	-	scaffold1027	433528	439260	-	4328	-	-	-
Eri030814	20.4469	14.3995	16.5924	16.3637	14.2078	27.6733	ERIdvaD_GLEAN_10020153	scaffold644	816325	818526	-	918	-	-	2OG-FeII_Oxy
Eri037275	14.8548	11.4578	13.4153	17.3385	11.3371	38.241	ERIdvaD_GLEAN_10032746	scaffold85	2716583	2718263	+	924	-	-	2OG-FeII_Oxy
Eri006200	1.38688	1.13092	0.863829	1.10026	1.00445	2.37513	ERIdvaD_GLEAN_10016089	scaffold1309	342489	349738	+	2907	-	-	Aa_trans
Eri006050	52.2463	30.5684	43.5629	45.7544	38.0073	73.6864	ERIdvaD_GLEAN_10002422	scaffold1295	126058	134034	-	3447	-	-	AAA
Eri031208	4.23361	3.32087	4.88526	4.35811	4.85132	11.4676	ERIdvaD_GLEAN_10010948	scaffold651	473089	476431	+	2256	-	-	ABC2_membrane
Eri037443	21.4938	17.4458	22.2783	26.0167	27.3798	38.829	ERIdvaD_GLEAN_10019043	scaffold854	157656	159557	+	927	-	-	Abhydrolase_1
Eri008497	14.443	11.8915	11.6559	11.4416	11.4271	19.334	ERIdvaD_GLEAN_10004536	scaffold1496	179432	180961	+	1017	-	-	Abhydrolase_3
Eri002228	4.38739	2.3557	2.91879	4.00336	3.06128	6.57028	ERIdvaD_GLEAN_10017043	scaffold1089	332615	335555	-	1518	-	-	Acyltransferase
Eri015727	17.643	9.80141	11.4916	16.8787	13.8037	29.2626	ERIdvaD_GLEAN_10000537	scaffold2428	20680	22933	-	1386	-	-	Acyltransferase
Eri009029	5.15208	5.38037	7.06323	8.76398	7.40657	18.9113	ERIdvaD_GLEAN_10013331	scaffold158	194875	197268	+	1101	-	-	ADH_N
Eri026137	9.1236	7.78393	6.24899	7.95133	8.17647	11.9634	ERIdvaD_GLEAN_10019004	scaffold511	597604	599259	-	912	-	-	Agenet
Eri029195	26.067	15.9398	19.2253	25.6842	25.9625	62.0757	ERIdvaD_GLEAN_10021301	scaffold611	102153	104752	+	1452	-	-	Aldedh
Eri024883	36.6713	45.5613	44.2177	47.5448	49.4715	65.272	ERIdvaD_GLEAN_10027985	scaffold489	1605310	1611431	+	1644	-	-	AMP-binding
Eri034586	12.504	14.7002	17.0813	11.9712	11.7543	21.7358	CUFF373.259.3	scaffold77	1743990	1747855	-	1407	-	-	AP2
Eri006500	7.47821	8.38065	6.64476	7.99301	7.14642	10.6037	ERIdvaD_GLEAN_10034471	scaffold133	2417870	2419567	+	1248	-	-	B3
Eri021664	4.62466	3.25791	3.68855	3.69677	4.40752	9.53344	ERIdvaD_GLEAN_10019581	scaffold395	968997	971187	+	936	-	-	B3
Eri033499	1.38572	1.00203	1.10708	1.15859	0.937872	2.67391	ERIdvaD_GLEAN_10013853	scaffold736	290763	293795	-	3033	-	-	C2
Eri009675	11.9693	8.75852	7.13099	9.58359	7.60788	12.8377	ERIdvaD_GLEAN_10008844	scaffold1602	4000	8132	+	1998	-	-	CH
Eri005545	84.4711	64.5555	67.5055	72.0164	76.3235	116.925	ERIdvaD_GLEAN_10013196	scaffold1260	237522	241827	-	1227	-	-	CRAL_TRIO_N
Eri007336	83.9509	189.698	119.3	73.3547	53.0199	128.544	ERIdvaD_GLEAN_10006773	scaffold139	186565	188767	-	375	-	-	Cu_bind_like
Eri006793	22.7275	17.6458	18.771	22.2973	18.243	33.4356	ERIdvaD_GLEAN_10006545	scaffold134	321288	324464	-	1497	-	-	Cyclin_C
Eri011603	32.4125	32.6406	33.5086	28.2852	30.3007	49.23	ERIdvaD_GLEAN_10001155	scaffold1796	18270	19948	+	1164	-	-	Cyclin_C
Eri020198	7.73045	6.28313	5.90908	6.04479	5.66007	9.31199	ERIdvaD_GLEAN_10010113	scaffold348	160676	163548	-	1347	-	-	Cyclin_C
Eri024132	6.4058	5.60092	6.41968	6.19524	6.261	16.144	ERIdvaD_GLEAN_10032297	scaffold472	2390922	2393557	+	951	-	-	Cyclin_C
Eri027948	4.05064	3.89012	3.06766	3.39093	2.80057	6.464	ERIdvaD_GLEAN_10010615	scaffold567	333687	338909	+	1782	-	-	Cyclin_C
Eri031158	16.0802	21.745	18.5969	20.0251	18.5381	27.8431	ERIdvaD_GLEAN_10013437	scaffold65	175439	177549	+	1413	-	-	Cyclin_C
Eri031286	9.73846	7.02609	5.9963	9.18068	6.76207	16.237	ERIdvaD_GLEAN_10001002	scaffold654	74351	76771	-	1149	-	-	Cyclin_C
Eri040122	9.22048	8.55115	8.05202	10.0367	8.70201	14.1672	ERIdvaD_GLEAN_10009184	scaffold976	299556	302364	+	1314	-	-	Cyclin_C
Eri035095	4.00065	7.08396	6.83194	9.29577	8.21538	11.327	ERIdvaD_GLEAN_10020733	scaffold788	1100654	1102621	-	1230	-	-	Cytochrom_B561
Eri018918	11.9502	7.87124	8.02299	5.86273	6.86899	15.2724	ERIdvaD_GLEAN_10005376	scaffold307	235874	242461	+	4470	-	-	DNA_gyraseB
Eri024335	21.8014	16.0142	15.7652	20.6028	19.8272	31.7409	ERIdvaD_GLEAN_10029917	scaffold478	310349	312707	-	1590	-	-	DUF315
Eri016096	13.3776	11.049	8.22744	16.5822	12.0516	26.8039	ERIdvaD_GLEAN_10033501	scaffold25	2677040	2682169	-	2853	-	-	E1-E2_ATPase
Eri040237	27.2521	17.4779	18.8798	21.63	16.486	42.9104	ERIdvaD_GLEAN_10008147	scaffold984	218350	222074	+	1707	-	-	FAD_binding_4
Eri013221	5.33094	4.56431	3.97186	4.6226	4.189	5.54048	ERIdvaD_GLEAN_10002206	scaffold2087	152369	160418	-	3459	-	-	FHA
Eri040374	3.09063	2.87246	2.77817	2.23029	2.33998	4.49439	ERIdvaD_GLEAN_10012917	scaffold994	110248	114151	+	3234	-	-	FHA
Eri022507	7.11682	5.46313	6.34364	6.0297	6.11172	8.52465	ERIdvaD_GLEAN_10015039	scaffold422	326960	330176	+	2022	-	-	Galactosyl_T
Eri006346	4.74291	3.22971	3.38697	3.18335	2.86124	9.62524	ERIdvaD_GLEAN_10002164	scaffold1325	46813	50222	+	1962	-	-	Glyco_hydro_3
Eri002801	7.70017	8.17485	8.88938	12.1804	9.34442	25.473	ERIdvaD_GLEAN_10006309	scaffold1116	23814	26236	-	1872	-	-	Glyco_transf_8
Eri011832	7.49948	10.6745	10.6887	14.0605	11.9825	20.6037	ERIdvaD_GLEAN_10028892	scaffold182	1725171	1730696	-	1599	-	-	Glyco_transf_8
Eri008558	64.5781	52.2281	47.0898	41.7822	32.1167	112.563	ERIdvaD_GLEAN_10013600	scaffold1499	604191	604886	-	426	-	-	Histone
Eri015675	19.6711	18.0986	22.8599	16.632	14.1401	41.7842	CUFF177.124.1	scaffold242	861967	862953	-	411	-	-	Histone
Eri023976	158.668	181.071	169.785	122.608	117.096	302.026	ERIdvaD_GLEAN_10032159	scaffold472	994434	994844	+	411	-	-	Histone
Eri026569	25.8295	44.87	43.7327	30.9338	26.0113	78.1291	ERIdvaD_GLEAN_10015087	scaffold527	111224	111778	+	450	-	-	Histone
Eri031595	49.5424	58.3079	52.664	44.8539	34.0381	86.3566	ERIdvaD_GLEAN_10013677	scaffold664	544341	545279	+	450	-	-	Histone
Eri021507	15.781	9.89296	11.7648	12.5141	11.7786	16.6243	ERIdvaD_GLEAN_10009669	scaffold39	711	3010	-	972	-	-	HLH
Eri000628	20.5515	22.2827	19.9461	21.1758	23.4343	35.0312	ERIdvaD_GLEAN_10031956	scaffold10	2576084	2578457	+	1152	-	-	HMA
Eri026561	10.8283	9.30078	12.4573	11.5627	11.6138	14.224	ERIdvaD_GLEAN_10015082	scaffold527	5259	6895	-	1293	-	-	HMA
Eri032492	20.8672	14.0349	17.294	9.90838	11.0359	23.4209	ERIdvaD_GLEAN_10018627	scaffold697	621538	625596	+	906	-	-	HMA
Eri023370	76.6208	52.4789	52.0308	41.192	45.897	100.288	ERIdvaD_GLEAN_10019984	scaffold455	981270	983726	-	1503	-	-	HMG_box
Eri039414	25.8566	17.8696	18.7645	23.456	19.0059	27.3077	ERIdvaD_GLEAN_10022545	scaffold94	637053	643447	+	1863	-	-	Ion_trans
Eri020540	16.0977	16.4751	17.3577	19.0312	21.5286	55.1355	ERIdvaD_GLEAN_10026049	scaffold359	1505675	1507045	+	1143	-	-	IQ
Eri000407	0	0	2.5426	0	1.76698	90.7354	ERIdvaD_GLEAN_10031754	scaffold10	577729	581432	+	720	-	-	K-box
Eri009416	36.3606	40.8381	63.0033	31.1215	66.1675	110.274	ERIdvaD_GLEAN_10031545	scaffold159	2452048	2455236	-	651	-	-	K-box
Eri030184	0	0.137233	2.19845	0.10161	0.371359	97.2394	ERIdvaD_GLEAN_10033841	scaffold64	502102	506827	+	720	-	-	K-box
Eri033768	3.55852	2.52046	3.57221	3.5867	6.65281	38.2685	ERIdvaD_GLEAN_10028301	scaffold741	1578274	1583669	-	768	-	-	K-box
Eri000949	16.7925	12.2538	10.1237	11.8216	12.3215	23.7835	ERIdvaD_GLEAN_10006859	scaffold1011	36303	43821	+	3846	-	-	Kinesin
Eri008036	4.44934	4.06096	3.15083	2.91139	2.96528	6.10969	ERIdvaD_GLEAN_10015949	scaffold1449	337777	341698	-	2112	-	-	Kinesin
Eri011551	26.1583	19.5419	17.9388	19.8468	18.5687	26.8865	ERIdvaD_GLEAN_10002871	scaffold1776	118212	123353	+	2109	-	-	Kinesin
Eri015921	10.6321	7.92344	6.81254	9.69592	9.08806	13.8079	CUFF180.89.1	scaffold249	319024	325442	-	2121	-	-	Kinesin
Eri019222	4.33798	4.05724	3.30794	3.33936	3.42481	5.54757	ERIdvaD_GLEAN_10002345	scaffold321	106498	113846	+	3801	-	-	Kinesin
Eri019227	6.01132	5.4182	5.25308	4.43245	4.6811	9.97432	ERIdvaD_GLEAN_10008358	scaffold322	22101	28140	+	3012	-	-	Kinesin
Eri036877	4.82202	3.79146	3.4236	2.59785	2.81456	5.29489	ERIdvaD_GLEAN_10008815	scaffold841	330697	339772	+	3789	-	-	Kinesin
Eri037946	13.949	12.3177	10.1281	13.8418	13.6405	16.8353	ERIdvaD_GLEAN_10019809	scaffold869	990156	995000	-	2982	-	-	Kinesin
Eri039792	8.70928	6.92253	7.10501	7.1876	6.47146	12.6743	CUFF424.85.1	scaffold959	215293	221351	+	3645	-	-	Kinesin
Eri015175	28.3811	18.7343	20.683	24.773	28.3535	62.9298	ERIdvaD_GLEAN_10027531	scaffold234	1612572	1614359	-	717	-	-	LAG1
Eri013667	27.0928	17.9921	16.7045	26.9801	23.9026	54.5158	ERIdvaD_GLEAN_10021690	scaffold217	862175	865067	+	1101	-	-	Lipase_GDSL
Eri022660	36.5201	27.1606	28.3182	42.0496	33.9004	50.9155	ERIdvaD_GLEAN_10026193	scaffold428	531932	533938	-	969	-	-	Lipase_GDSL
Eri023942	19.0511	12.7529	12.3096	22.7191	18.2509	52.5161	ERIdvaD_GLEAN_10032128	scaffold472	693658	695415	-	1104	-	-	Lipase_GDSL
Eri033051	18.8338	14.3689	14.6346	22.4665	20.2792	44.4404	ERIdvaD_GLEAN_10008176	scaffold710	188479	190956	+	1077	-	-	Lipase_GDSL
Eri033863	2.25122	1.61649	1.69736	2.14498	1.6907	5.16203	ERIdvaD_GLEAN_10011666	scaffold744	315326	319019	+	1086	-	-	Lipase_GDSL
Eri035871	10.4436	6.71996	6.24414	11.6447	8.75719	15.771	ERIdvaD_GLEAN_10009312	scaffold816	16859	20164	-	1245	-	-	Lipase_GDSL
Eri036570	168.369	118.485	148.105	197.707	157.113	335.186	CUFF391.192.1	scaffold834	1037452	1039424	-	714	-	-	Lipase_GDSL
novel.4121	38.2847	17.7228	21.2126	29.0566	23.4709	91.5868	-	scaffold28	70804	73674	+	2270	-	PF00657:GDSL-like Lipase/Acylhydrolase	Lipase_GDSL
Eri005329	7.43946	5.33333	6.58525	5.68889	6.91092	18.9724	ERIdvaD_GLEAN_10012029	scaffold1246	111966	115758	-	2478	-	-	Lipoxygenase
Eri000603	19.2612	8.42889	11.4171	12.0048	9.70753	25.8361	ERIdvaD_GLEAN_10031932	scaffold10	2387875	2398108	-	2667	-	-	MatE
Eri040321	22.8522	23.1056	21.1284	23.957	20.5285	34.9066	ERIdvaD_GLEAN_10017892	scaffold99	529062	535043	-	897	-	-	Methyltransf_11
Eri017279	13.6138	16.0847	13.2882	14.2635	14.7662	18.0526	ERIdvaD_GLEAN_10014032	scaffold269	22343	24176	+	759	-	-	Mpv17_PMP22
Eri004581	4.31134	3.65653	3.4499	3.5675	3.03942	5.84774	ERIdvaD_GLEAN_10025164	scaffold1209	902661	907559	-	3063	-	-	Myb_DNA-binding
Eri010726	10.6879	8.35029	10.8734	9.48893	8.88715	20.2764	ERIdvaD_GLEAN_10032451	scaffold170	1622698	1624775	+	1170	-	-	Myb_DNA-binding
Eri019292	5.11087	5.09055	5.24027	4.08839	4.20745	10.3163	ERIdvaD_GLEAN_10016532	scaffold323	724200	727137	+	1056	-	-	Myb_DNA-binding
Eri033557	6.68196	6.36562	5.10799	5.54828	5.32583	7.65625	ERIdvaD_GLEAN_10018788	scaffold74	440562	444644	+	3027	-	-	Myb_DNA-binding
Eri014833	11.707	12.2733	8.28101	7.8295	8.2055	10.9168	ERIdvaD_GLEAN_10020348	scaffold23	1097051	1116363	+	1581	-	-	Na_H_Exchanger
Eri035399	5.3075	7.76576	4.87459	5.91678	6.04693	7.5903	ERIdvaD_GLEAN_10011537	scaffold797	580596	585246	-	1713	-	-	Na_H_Exchanger
Eri007710	2.59255	3.07575	3.67741	4.5561	4.31732	6.25783	ERIdvaD_GLEAN_10024546	scaffold141	902365	904224	-	1206	-	-	NAM
Eri018754	1.46935	2.18529	1.39142	1.52048	1.43977	1.99807	CUFF207.104.1	scaffold301	296026	300004	+	2850	-	-	NB-ARC
Eri024133	7.67534	4.24268	7.99301	6.32423	6.47145	9.49548	ERIdvaD_GLEAN_10032298	scaffold472	2397160	2398749	-	1590	-	-	NB-ARC
Eri030287	60.8484	55.7796	78.6265	74.6749	72.2195	148.033	ERIdvaD_GLEAN_10033934	scaffold64	1528562	1532535	-	1059	-	-	NmrA
Eri004239	100.177	57.4259	92.7733	93.1446	87.1394	164.996	ERIdvaD_GLEAN_10017778	scaffold1184	329490	332453	+	1545	-	-	p450
Eri006132	54.7916	39.4758	54.141	63.2326	68.4609	161.111	ERIdvaD_GLEAN_10004059	scaffold1302	199502	202490	-	1608	-	-	p450
Eri028461	15.1008	8.55392	13.005	10.652	9.48574	31.0296	ERIdvaD_GLEAN_10014308	scaffold589	300546	304343	+	1668	-	-	p450
Eri037198	1.92877	3.154	4.70913	3.41372	3.58433	5.20569	ERIdvaD_GLEAN_10032678	scaffold85	1892675	1894186	-	1341	-	-	p450
Eri037956	26.9937	27.0759	35.1447	46.9713	41.1249	98.7876	ERIdvaD_GLEAN_10019819	scaffold869	1114180	1116484	-	1551	-	-	p450
Eri002139	10.1206	7.32884	7.74468	7.99385	7.00207	12.1146	ERIdvaD_GLEAN_10004174	scaffold1072	200847	203184	-	1389	-	-	Peptidase_C1
novel.2338	41.5113	42.3037	38.2071	50.0912	44.5941	56.0341	-	scaffold1462	136643	141651	+	2509	-	PF00365:Phosphofructokinase	PFK
Eri002037	28.5307	24.1887	19.2495	25.882	26.2416	42.6665	ERIdvaD_GLEAN_10007046	scaffold1064	120945	139266	+	2532	-	-	PK
Eri001797	25.8096	16.5401	17.6465	20.6801	18.1774	26.9622	ERIdvaD_GLEAN_10009515	scaffold1046	440763	443782	+	1383	-	-	Pkinase
Eri005061	21.2777	20.0875	16.6562	21.409	18.6333	25.5379	ERIdvaD_GLEAN_10024844	scaffold123	551349	555338	-	1536	-	-	Pkinase
Eri005114	25.6143	16.8751	17.2798	16.9623	16.7755	27.2302	ERIdvaD_GLEAN_10024896	scaffold123	1032062	1033244	+	564	-	-	Pkinase
Eri009466	51.2793	41.613	39.651	46.1442	39.4306	72.8634	ERIdvaD_GLEAN_10005980	scaffold1595	197653	199453	+	945	-	-	Pkinase
Eri010355	7.29647	5.64647	5.28422	6.62321	5.34558	8.06816	ERIdvaD_GLEAN_10009846	scaffold1671	381344	385880	-	3438	-	-	Pkinase
Eri010575	32.4362	22.0055	21.5186	19.1577	21.7266	33.541	ERIdvaD_GLEAN_10018326	scaffold17	978216	982622	-	915	-	-	Pkinase
Eri011868	4.41611	4.68683	4.35334	3.70806	3.89966	8.01018	ERIdvaD_GLEAN_10007126	scaffold1821	12972	14971	+	1263	-	-	Pkinase
Eri012372	15.4324	13.1666	12.0666	14.3486	11.5365	17.8833	ERIdvaD_GLEAN_10007213	scaffold192	236389	240929	+	1890	-	-	Pkinase
Eri014462	35.3325	25.0984	28.6409	22.537	18.0728	50.8824	CUFF164.201.2	scaffold227	412835	419798	-	2979	-	-	Pkinase
Eri015255	12.4441	8.73569	10.063	11.2788	10.9161	21.7512	ERIdvaD_GLEAN_10003789	scaffold2351	195824	198393	+	1806	-	-	Pkinase
Eri016293	3.8932	3.94886	3.6206	3.81663	3.87144	7.66711	ERIdvaD_GLEAN_10019346	scaffold253	397542	400669	-	1290	-	-	Pkinase
Eri017081	11.3834	9.02838	6.1492	9.60584	8.01048	14.4227	ERIdvaD_GLEAN_10030743	scaffold264	2421317	2423976	-	2406	-	-	Pkinase
Eri017979	17.9716	11.7492	11.0777	15.4881	13.0647	21.1428	ERIdvaD_GLEAN_10029827	scaffold288	623933	627662	-	1818	-	-	Pkinase
Eri023540	23.9574	22.617	17.1806	22.4356	18.941	38.3226	ERIdvaD_GLEAN_10003180	scaffold461	164871	166794	-	1641	-	-	Pkinase
Eri024509	15.6343	12.5589	13.8414	17.0904	12.4711	26.28	ERIdvaD_GLEAN_10023735	scaffold48	630208	632717	-	1356	-	-	Pkinase
Eri027456	26.2803	14.0753	17.0659	19.0932	14.2266	35.2913	ERIdvaD_GLEAN_10020807	scaffold556	933084	935034	-	912	-	-	Pkinase
Eri030966	21.8026	22.7742	19.3114	24.294	20.1811	28.6705	ERIdvaD_GLEAN_10031056	scaffold648	672672	675272	-	2277	-	-	Pkinase
Eri031134	4.57477	4.07517	4.64789	4.29035	3.99547	9.75223	ERIdvaD_GLEAN_10031197	scaffold648	2452687	2458081	-	2841	-	-	Pkinase
Eri034180	35.1063	32.7355	25.4382	32.2301	26.4144	45.1967	ERIdvaD_GLEAN_10001659	scaffold755	58554	61060	+	1503	-	-	Pkinase
Eri037368	14.302	13.0185	10.8913	15.1485	11.5082	18.435	ERIdvaD_GLEAN_10007945	scaffold851	28543	30992	-	885	-	-	Pkinase
Eri037448	72.6765	58.1902	55.3472	48.3349	42.6393	109.253	CUFF398.94.2	scaffold854	196863	204306	-	2979	-	-	Pkinase
novel.6716	2.51783	3.33014	2.82969	2.01231	2.62363	2.31751	-	scaffold66	993145	997533	-	3520	-	PF00564:PB1 domain|PF07714:Protein tyrosine kinase	Pkinase
Eri037662	15.3051	13.399	18.1367	16.5626	14.0165	21.8799	ERIdvaD_GLEAN_10022114	scaffold857	45687	49194	+	1188	-	-	POX
Eri009586	9.4909	7.02398	8.362	10.3364	10.4925	13.705	CUFF108.159.1	scaffold160	959003	963150	-	1275	-	-	PP2C
Eri027684	6.91186	8.03532	7.38116	7.41956	8.99387	21.1475	ERIdvaD_GLEAN_10026673	scaffold562	1272997	1275601	+	939	-	-	Prenyltransf
Eri006475	17.3497	13.0415	10.6997	11.9779	10.842	24.9516	ERIdvaD_GLEAN_10034447	scaffold133	1991945	1994399	+	1107	-	-	Pro_isomerase
Eri007233	17.0786	18.2998	16.9453	15.253	15.2427	27.6375	ERIdvaD_GLEAN_10003742	scaffold1373	240436	241823	-	552	-	-	Ras
Eri027042	22.9404	16.2473	18.9231	16.8531	14.1979	22.3085	ERIdvaD_GLEAN_10030430	scaffold54	2280161	2282834	+	654	-	-	Ras
Eri035237	72.0974	56.5587	86.7418	72.3445	67.2163	81.3107	ERIdvaD_GLEAN_10024066	scaffold791	1000351	1001077	+	627	-	-	RRM_1
Eri032971	39.1661	40.6695	46.9734	39.0682	37.0307	49.5545	ERIdvaD_GLEAN_10022901	scaffold708	1026326	1027857	-	1260	-	-	SAM_decarbox
Eri003696	139.11	88.9641	84.9295	96.277	89.5565	125.923	ERIdvaD_GLEAN_10009045	scaffold1152	453653	455187	-	495	-	-	SBP
Eri014125	25.6935	17.3581	14.457	21.0893	20.4619	33.7189	ERIdvaD_GLEAN_10033289	scaffold22	2558321	2561278	-	1434	-	-	SBP
novel.7287	52.8341	36.7805	45.7239	37.3661	32.7721	63.1194	-	scaffold774	1112606	1115286	-	1961	-	PF03110:SBP domain	SBP
Eri038555	1.99265	1.77111	1.54937	1.38589	1.35161	2.5952	ERIdvaD_GLEAN_10012613	scaffold908	170899	177310	-	3609	-	-	SMC_N
Eri012032	15.7082	8.14087	8.69104	10.6053	9.39291	13.5157	ERIdvaD_GLEAN_10014621	scaffold186	540518	542304	+	894	-	-	SNARE
Eri022946	20.9941	24.7395	29.1808	32.3618	23.4678	42.2246	ERIdvaD_GLEAN_10007185	scaffold443	313893	315555	-	954	-	-	SNARE
Eri023104	56.7525	71.6476	82.4205	77.2203	100.433	38.8379	-	scaffold448	278367	286323	-	648	-	-	SRF-TF
Eri036622	44.9218	29.528	36.1335	29.859	23.5969	58.7099	ERIdvaD_GLEAN_10029652	scaffold834	1658917	1661924	+	651	-	-	SSXT
Eri032038	6.0055	5.20227	6.37972	5.85627	7.0625	22.2441	ERIdvaD_GLEAN_10014210	scaffold688	94515	100803	+	2220	-	-	START
Eri030242	13.329	10.0462	10.292	11.9283	9.83141	32.0017	ERIdvaD_GLEAN_10033890	scaffold64	1050314	1056266	+	1089	-	-	Str_synth
novel.6710	0.0386394	0.127088	0.0407243	0	0.0702842	0	-	scaffold66	56878	57367	-	490	-	PF01582:TIR domain	TIR
novel.6714	2.90672	2.61225	3.10332	2.84636	2.43142	3.12568	-	scaffold66	514406	789741	-	33138	-	PF01582:TIR domain|PF00931:NB-ARC domain|PF13855:Leucine rich repeat	TIR
Eri015214	14.9224	8.42081	8.88476	9.36118	7.65975	17.7339	CUFF170.368.2	scaffold234	1956244	1960153	+	1248	-	-	Tub
Eri001210	69.416	41.1507	43.308	38.617	35.4545	95.2145	ERIdvaD_GLEAN_10020193	scaffold1024	139534	141213	-	1353	-	-	Tubulin
Eri008047	47.3277	35.8616	33.9825	41.0103	36.9566	75.9044	CUFF93.66.1	scaffold1449	483710	486272	-	1344	-	-	Tubulin
Eri010692	59.0912	38.374	36.3777	36.981	36.2091	75.6216	ERIdvaD_GLEAN_10032424	scaffold170	1266015	1267747	+	1353	-	-	Tubulin
Eri011938	669.265	491.593	392.427	613.045	458.582	718.308	ERIdvaD_GLEAN_10004156	scaffold183	45825	47896	+	1353	-	-	Tubulin
Eri015572	131.696	79.535	86.5092	105.382	81.9909	220.17	CUFF176.121.1	scaffold2411	20266	23205	+	1344	-	-	Tubulin
Eri026400	72.3664	47.3122	49.1879	49.0902	48.3891	75.0422	ERIdvaD_GLEAN_10019852	scaffold520	480712	482694	+	1425	-	-	Tubulin
Eri039921	288.6	204.037	205.272	231.994	185.349	310.9	ERIdvaD_GLEAN_10003662	scaffold965	13018	15439	-	1356	-	-	Tubulin
Eri040063	9.21058	5.91112	5.23405	7.65454	6.37364	9.63795	ERIdvaD_GLEAN_10024761	scaffold973	1249701	1251491	-	798	-	-	Tubulin
Eri028114	4.95697	1.82224	3.77585	2.56292	2.4489	4.50988	ERIdvaD_GLEAN_10017644	scaffold574	873326	874689	-	1290	-	-	UDPGT
Eri032662	43.042	35.7692	34.6629	32.306	34.1084	61.0466	ERIdvaD_GLEAN_10017521	scaffold7	606628	608345	-	681	-	-	Usp
Eri004038	41.2353	32.24	29.4533	36.9246	35.1108	53.4816	CUFF49.8.1	scaffold1174	51496	54630	+	798	-	-	YABBY
Eri010230	17.8467	16.8063	20.0456	17.0103	16.9057	31.8266	ERIdvaD_GLEAN_10004828	scaffold1665	4350	9294	+	2577	-	-	zf-C3HC4
Eri021788	27.7929	32.5657	33.5273	29.1738	27.1027	50.5351	ERIdvaD_GLEAN_10030118	scaffold396	1848549	1849959	+	744	-	-	zf-Dof
Eri002428	78.3318	45.0527	62.8033	57.8378	44.9548	104.303	ERIdvaD_GLEAN_10030820	scaffold11	1040833	1041861	-	1029	-	-	ZF-HD_dimer
Eri026730	40.0021	34.774	41.0835	31.6772	32.6167	74.0762	ERIdvaD_GLEAN_10028355	scaffold53	371013	371876	+	864	-	-	ZF-HD_dimer
Eri028637	43.3133	29.4482	41.9567	33.3349	22.6481	70.9845	ERIdvaD_GLEAN_10014558	scaffold598	710697	711326	+	630	-	-	ZF-HD_dimer
Eri030015	23.2272	15.4866	26.5119	17.9149	13.9157	44.2145	ERIdvaD_GLEAN_10026497	scaffold635	1811188	1812204	+	1017	-	-	ZF-HD_dimer
